# Supplementary material for: Screening for Virulence-Related Genes via a Transposon Mutant Library of Streptococcus suis Serotype 2 Using a Galleria mellonella Larvae Infection Model
Source: MDPI journal article supplement (doi:10.3390/microorganisms10050868), 2022-04-21
Supplement: s1 [file s1]

**Table S1.** Tn mutants information.

| <b>Locus Tag</b> | <b>Protein Name</b>                       | <b>Tn Mutants</b>                                                                                                                                                                                                                                                                                             |
|------------------|-------------------------------------------|---------------------------------------------------------------------------------------------------------------------------------------------------------------------------------------------------------------------------------------------------------------------------------------------------------------|
| B9H01_RS05050    | ABC transporter ATP-binding protein       | Tn52, Tn64, Tn123, Tn180, Tn204, Tn216, Tn393, Tn483, Tn502, Tn562, Tn578, Tn672, Tn679, Tn699, Tn746, Tn1012, Tn1025, Tn1030, Tn1031, Tn1050, Tn1074, Tn1093, Tn1095, Tn1145, Tn1171, Tn1219, Tn1238, Tn1243, Tn1368, Tn1370, Tn1553, Tn1566, Tn1609, Tn1620, Tn1660, Tn1666, Tn1679, Tn1768, Tn1871, Tn1876 |
| B9H01_RS05005    | 8-oxo-dgtp diphosphatase                  | Tn94, Tn136, Tn141, Tn199, Tn203, Tn214, Tn221, Tn265, Tn270, Tn327, Tn406, Tn422, Tn430, Tn487, Tn570, Tn771, Tn785, Tn786, Tn809, Tn818, Tn864, Tn871, Tn915, Tn917, Tn976, Tn977, Tn1183, Tn1199, Tn1473, Tn1552, Tn1595, Tn1614, Tn1667, Tn1671, Tn1765, Tn1830                                           |
| B9H01_RS05070    | Protein (LacX)                            | Tn119, Tn177, Tn207, Tn305, Tn428, Tn436, Tn479, Tn493, Tn521, Tn696, Tn726, Tn762, Tn789, Tn844, Tn859, Tn867, Tn886, Tn920, Tn964, Tn1072, Tn1106, Tn1178, Tn1280, Tn1286, Tn1357, Tn1379, Tn1388, Tn1565, Tn1649, Tn1695, Tn1772, Tn1826, Tn1840                                                           |
| B9H01_RS04990    | 1,4-alpha-glucan branching protein (GlgB) | Tn82, Tn120, Tn174, Tn205, Tn206, Tn253, Tn621, Tn695, Tn703, Tn766, Tn842, Tn866, Tn882, Tn1027, Tn1215, Tn1236, Tn1269, Tn1325, Tn1390, Tn1423, Tn1444, Tn1457, Tn1723, Tn1790, Tn1892, Tn1902, Tn1909                                                                                                      |
| B9H01_RS05230    | Peptidase                                 | Tn2, Tn269, Tn273, Tn306, Tn381, Tn398, Tn449, Tn509, Tn654, Tn727, Tn739, Tn787, Tn887, Tn940, Tn952, Tn958, Tn989, Tn998, Tn1060, Tn1320, Tn1509, Tn1663, Tn1744                                                                                                                                            |
| B9H01_RS04750    | Hypothetical protein                      | Tn9, Tn46, Tn93, Tn329, Tn468, Tn730, Tn742, Tn926, Tn943, Tn1043, Tn1115, Tn1160, Tn1256, Tn1265, Tn1323, Tn1342, Tn1431, Tn1451, Tn1471, Tn1617                                                                                                                                                             |
| B9H01_RS05235    | JAB domain-containing protein             | Tn13, Tn36, Tn102, Tn226, Tn233, Tn626, Tn653, Tn682, Tn769, Tn799, Tn833, Tn985, Tn1127, Tn1278, Tn1297, Tn1469, Tn1562, Tn1714, Tn1721, Tn1752                                                                                                                                                              |
| B9H01_RS04765    | Glucan-binding protein                    | Tn15, Tn92, Tn191, Tn290, Tn303, Tn457, Tn477, Tn942, Tn996, Tn1179, Tn1214, Tn1331, Tn1391, Tn1420, Tn1540, Tn1672, Tn1687, Tn1889                                                                                                                                                                           |

| Locus Tag     | Protein Name                                                 | Tn Mutants                                                                                                                      |
|---------------|--------------------------------------------------------------|---------------------------------------------------------------------------------------------------------------------------------|
| B9H01_RS03005 | Hypothetical protein                                         | Tn38, Tn166, Tn227, Tn399, Tn563, Tn591, Tn592, Tn645, Tn733, Tn961, Tn983, Tn1053, Tn1133, Tn1389, Tn1422, Tn1593, Tn1624      |
| B9H01_RS04780 | CHAP domain-containing protein                               | Tn66, Tn95, Tn353, Tn488, Tn863, Tn1105, Tn1114, Tn1130, Tn1142, Tn1275, Tn1277, Tn1338, Tn1371, Tn1812, Tn1820, Tn1870, Tn1914 |
| B9H01_RS05090 | Transcriptional anti-terminator                              | Tn40, Tn44, Tn301, Tn313, Tn564, Tn567, Tn670, Tn671, Tn717, Tn776, Tn855, Tn931, Tn1049, Tn1456, Tn1682, Tn1766                |
| B9H01_RS02990 | MULTISPECIES: hypothetical protein                           | Tn272, Tn279, Tn362, Tn752, Tn795, Tn807, Tn810, Tn1067, Tn1148, Tn1245, Tn1454, Tn1574, Tn1722                                 |
| B9H01_RS05000 | Amino acid ABC transporter substrate-binding protein         | Tn105, Tn263, Tn345, Tn403, Tn919, Tn1042, Tn1107, Tn1482, Tn1492, Tn1705, Tn1720, Tn1801, Tn1852                               |
| B9H01_RS04475 | Asparagine synthetase                                        | Tn33, Tn55, Tn87, Tn112, Tn262, Tn264, Tn623, Tn690, Tn714, Tn824, Tn881, Tn1777                                                |
| B9H01_RS04805 | Conjugal transfer protein (TraG)                             | Tn32, Tn104, Tn172, Tn188, Tn317, Tn318, Tn387, Tn451, Tn768, Tn1120, Tn1458, Tn1895                                            |
| B9H01_RS05075 | 6-phospho-beta-galactosidase                                 | Tn460, Tn597, Tn784, Tn792, Tn880, Tn897, Tn1164, Tn1249, Tn1362, Tn1403, Tn1732, Tn1874                                        |
| B9H01_RS05065 | Hypothetical protein                                         | Tn47, Tn126, Tn504, Tn662, Tn979, Tn993, Tn1318, Tn1696, Tn1729, Tn1747, Tn1884                                                 |
| B9H01_RS04330 | Phosphomannomutase/phosphoglucomutase                        | Tn4, Tn73, Tn417, Tn712, Tn750, Tn1233, Tn1255, Tn1260, Tn1594, Tn1731                                                          |
| B9H01_RS04675 | ABC transporter                                              | Tn938, Tn1161, Tn1163, Tn1460, Tn1572, Tn1691, Tn1796, Tn1811, Tn1861, Tn1897                                                   |
| B9H01_RS04775 | Nucleotidyl transferase abieii/abigii toxin family protein   | Tn74, Tn245, Tn250, Tn605, Tn648, Tn1202, Tn1483, Tn1501, Tn1564, Tn1899                                                        |
| B9H01_RS04995 | Amino acid ABC transporter substrate-binding protein         | Tn200, Tn201, Tn431, Tn556, Tn763, Tn1094, Tn1190, Tn1428, Tn1701, Tn1873                                                       |
| B9H01_RS05085 | MULTISPECIES: PTS lactose/cellobiose transporter subunit IIA | Tn348, Tn584, Tn665, Tn738, Tn910, Tn928, Tn947, Tn1155, Tn1167, Tn1725                                                         |
| B9H01_RS05160 | A/G-specific adenine glycosylase                             | Tn299, Tn409, Tn734, Tn909, Tn949, Tn1271, Tn1316, Tn1401, Tn1819, Tn1823                                                       |
| B9H01_RS00700 | Cell division protein (FtsK)                                 | Tn284, Tn357, Tn529, Tn802, Tn814, Tn1057, Tn1226, Tn1683, Tn1726                                                               |

| <b>Locus Tag</b> | <b>Protein Name</b>                                          | <b>Tn Mutants</b>                                                    |
|------------------|--------------------------------------------------------------|----------------------------------------------------------------------|
| B9H01_RS03155    | N-acetyl-beta-hexosaminidase                                 | Tn684, Tn890, Tn1041, Tn1128, Tn1151, Tn1192, Tn1495, Tn1760, Tn1894 |
| B9H01_RS04355    | ABC transporter permease                                     | Tn7, Tn56, Tn351, Tn508, Tn1103, Tn1169, Tn1445, Tn1449, Tn1741      |
| B9H01_RS05060    | MULTISPECIES: hypothetical protein                           | Tn453, Tn523, Tn634, Tn728, Tn788, Tn877, Tn885, Tn1396, Tn1644      |
| B9H01_RS05145    | Hypothetical protein                                         | Tn29, Tn211, Tn354, Tn835, Tn902, Tn1311, Tn1497, Tn1527, Tn1785     |
| B9H01_RS04785    | Atpase AAA                                                   | Tn127, Tn601, Tn1110, Tn1217, Tn1272, Tn1340, Tn1619, Tn1709         |
| B9H01_RS05015    | Peptidase M26                                                | Tn249, Tn914, Tn1292, Tn1742, Tn1783, Tn1817, Tn1821, Tn1855         |
| B9H01_RS05505    | Hypothetical protein                                         | Tn238, Tn246, Tn1146, Tn1289, Tn1398, Tn1546, Tn1605, Tn1681         |
| B9H01_RS04375    | MULTISPECIES: ABC transporter ATP-binding protein            | Tn729, Tn732, Tn791, Tn837, Tn1073, Tn1673, Tn1887                   |
| B9H01_RS04385    | Hypothetical protein                                         | Tn526, Tn843, Tn1017, Tn1248, Tn1670, Tn1805, Tn1911                 |
| B9H01_RS04405    | Hypothetical protein                                         | Tn122, Tn1121, Tn1287, Tn1315, Tn1502, Tn1903, Tn1905                |
| B9H01_RS04450    | ABC transporter permease                                     | Tn23, Tn86, Tn169, Tn850, Tn944, Tn1531                              |
| B9H01_RS04570    | MULTISPECIES: antirestriction protein (ArdA)                 | Tn170, Tn1054, Tn1138, Tn1375, Tn1459, Tn1841                        |
| B9H01_RS04610    | ATP-dependent endonuclease                                   | Tn164, Tn1147, Tn1177, Tn1349, Tn1384, Tn1486                        |
| B9H01_RS05095    | Tagatose-bisphosphate aldolase                               | Tn168, Tn501, Tn805, Tn1013, Tn1281, Tn1762                          |
| B9H01_RS05105    | MULTISPECIES: galactose-6-phosphate isomerase subunit (LacB) | Tn183, Tn314, Tn613, Tn649, Tn823, Tn1435                            |
| B9H01_RS05125    | Hypothetical protein                                         | Tn54, Tn235, Tn861, Tn995, Tn1065, Tn1208                            |
| B9H01_RS05485    | Permease                                                     | Tn81, Tn242, Tn820, Tn899, Tn1036, Tn1776                            |
| B9H01_RS05570    | VTC domain-containing protein                                | Tn1038, Tn1186, Tn1230, Tn1418, Tn1462, Tn1868                       |
| B9H01_RS01170    | DUF4838 domain-containing protein                            | Tn78, Tn239, Tn254, Tn1327, Tn1567                                   |
| B9H01_RS01945    | ATP-binding protein                                          | Tn500, Tn1019, Tn1476, Tn1571, Tn1745                                |
| B9H01_RS03545    | Glycerol dehydrogenase                                       | Tn1076, Tn1306, Tn1563, Tn1757, Tn1857                               |
| B9H01_RS04365    | ABC transporter permease                                     | Tn1170, Tn1242, Tn1414, Tn1446, Tn1716                               |

| Locus Tag     | Protein Name                                                       | Tn Mutants                             |
|---------------|--------------------------------------------------------------------|----------------------------------------|
| B9H01_RS04465 | ABC transporter ATP-binding protein                                | Tn352, Tn359, Tn1298, Tn1425, Tn1906   |
| B9H01_RS04920 | Septum formation inhibitor (Maf)                                   | Tn1227, Tn1479, Tn1650, Tn1703, Tn1715 |
| B9H01_RS05055 | O-acetylhomoserine aminocarboxypropyltransferase/cysteine synthase | Tn294, Tn402, Tn439, Tn841, Tn1328     |
| B9H01_RS05140 | Integrase                                                          | Tn34, Tn309, Tn311, Tn312, Tn583       |
| B9H01_RS07430 | Bifunctional metallophosphatase/5'-nucleotidase                    | Tn27, Tn61, Tn986, Tn1189, Tn1372      |
| B9H01_RS01055 | PTS sugar transporter subunit IIC                                  | Tn736, Tn1075, Tn1541, Tn1918          |
| B9H01_RS01165 | PTS sugar transporter subunit IIC                                  | Tn713, Tn1048, Tn1218, Tn1426          |
| B9H01_RS01940 | Hypothetical protein                                               | Tn222, Tn956, Tn1089, Tn1603           |
| B9H01_RS03550 | Glycerol dehydrogenase                                             | Tn63, Tn282, Tn471, Tn1771             |
| B9H01_RS03990 | Subtilisin-like serine protease(SspA)                              | Tn98, Tn371, Tn1099, Tn1283            |
| B9H01_RS04555 | MULTISPECIES: membrane protein                                     | Tn689, Tn819, Tn1339, Tn1622           |
| B9H01_RS04560 | MULTISPECIES: ATP/GTP-binding protein                              | Tn498, Tn518, Tn673, Tn1141            |
| B9H01_RS04650 | DNA-binding response regulator                                     | Tn528, Tn538, Tn542, Tn1263            |
| B9H01_RS04695 | MULTISPECIES: recombinase family protein                           | Tn42, Tn425, Tn1382, Tn1788            |
| B9H01_RS04740 | Hypothetical protein                                               | Tn3, Tn274, Tn1815, Tn1816             |
| B9H01_RS04795 | Conjugal transfer protein (TrbL)                                   | Tn369, Tn610, Tn1098, Tn1480           |
| B9H01_RS04815 | CPBP family intramembrane metalloprotease                          | Tn67, Tn397, Tn1558, Tn1698            |
| B9H01_RS04885 | Coa-disulfide reductase                                            | Tn148, Tn646, Tn1229, Tn1310           |
| B9H01_RS05120 | Deor/glpr transcriptional regulator                                | Tn396, Tn506, Tn1001, Tn1773           |
| B9H01_RS05130 | DNA-binding protein                                                | Tn219, Tn987, Tn1033, Tn1252           |
| B9H01_RS05155 | XRE family transcriptional regulator                               | Tn154, Tn589, Tn898, Tn1864            |
| B9H01_RS05170 | ABC transporter ATP-binding protein                                | Tn537, Tn554, Tn1174, Tn1913           |
| B9H01_RS05640 | Beta-glucuronidase                                                 | Tn271, Tn822, Tn1285, Tn1369           |
| B9H01_RS05650 | Glucuronide permease                                               | Tn116, Tn632, Tn663, Tn1188            |

| Locus Tag     | Protein Name                                                                                             | Tn Mutants                    |
|---------------|----------------------------------------------------------------------------------------------------------|-------------------------------|
| B9H01_RS05870 | Hyaluronidase                                                                                            | Tn660, Tn700, Tn813, Tn980    |
| B9H01_RS05885 | PTS<br>mannose/fructose/sorbose<br>/N-acetylgalactosamine<br>transporter subunit IIC                     | Tn125, Tn704, Tn705, Tn969    |
| B9H01_RS05905 | Bifunctional 2-keto-4-<br>hydroxyglutarate<br>aldolase/2-keto-3-deoxy-<br>6-phosphogluconate<br>aldolase | Tn132, Tn1587, Tn1750, Tn1882 |
| B9H01_RS05920 | Gluconate 5-<br>dehydrogenase                                                                            | Tn622, Tn702, Tn1015, Tn1392  |
| B9H01_RS06130 | Histidine triad protein                                                                                  | Tn656, Tn816, Tn941, Tn1775   |
| B9H01_RS09215 | Alpha-mannosidase                                                                                        | Tn41, Tn404, Tn701, Tn1610    |
| B9H01_RS09610 | Radical SAM protein                                                                                      | Tn19, Tn851, Tn916, Tn1253    |
| B9H01_RS00850 | Bifunctional<br>folylpolyglutamate<br>synthase/dihydrofolate<br>synthase                                 | Tn698, Tn1092, Tn1781         |
| B9H01_RS01175 | Sugar ABC transporter<br>substrate-binding protein                                                       | Tn778, Tn1573, Tn1810         |
| B9H01_RS01835 | Deoxyguanosinetriphosp<br>hate triphosphohydrolase                                                       | Tn666, Tn1150, Tn1464         |
| B9H01_RS01860 | Copper homeostasis<br>protein (CutC)                                                                     | Tn187, Tn337, Tn338           |
| B9H01_RS02280 | Beta-galactosidase                                                                                       | Tn146, Tn455, Tn1168          |
| B9H01_RS02335 | Hypothetical protein                                                                                     | Tn599, Tn963, Tn1544          |
| B9H01_RS02800 | Bifunctional dnaq family<br>exonuclease/ATP-<br>dependent helicase                                       | Tn854, Tn1232, Tn1706         |
| B9H01_RS03230 | MULTISPECIES: rna<br>pseudouridine synthase                                                              | Tn296, Tn959, Tn990           |
| B9H01_RS03235 | Glutathione peroxidase                                                                                   | Tn1158, Tn1554, Tn1843        |
| B9H01_RS03345 | Cation transporter                                                                                       | Tn412, Tn1692, Tn1727         |
| B9H01_RS03415 | DEAD/DEAH box<br>helicase                                                                                | Tn17, Tn1135, Tn1493          |
| B9H01_RS04305 | DUF3307 domain-<br>containing protein                                                                    | Tn486, Tn1237, Tn1608         |
| B9H01_RS04390 | Carbamoyl phosphate<br>synthase large subunit                                                            | Tn1351, Tn1604, Tn1616        |
| B9H01_RS04425 | Site-specific integrase                                                                                  | Tn497, Tn1003, Tn1500         |
| B9H01_RS04430 | MULTISPECIES:<br>DUF3173 domain-<br>containing protein                                                   | Tn1394, Tn1601, Tn1748        |
| B9H01_RS04440 | Sensor histidine kinase                                                                                  | Tn1172, Tn1268, Tn1294        |

| <b>Locus Tag</b> | <b>Protein Name</b>                                              | <b>Tn Mutants</b>      |
|------------------|------------------------------------------------------------------|------------------------|
| B9H01_RS04445    | DNA-binding response regulator                                   | Tn491, Tn527, Tn1519   |
| B9H01_RS04480    | Chromosome segregation atpase                                    | Tn1485, Tn1506, Tn1640 |
| B9H01_RS04495    | ATP-binding protein                                              | Tn96, Tn295, Tn1119    |
| B9H01_RS04640    | DNA primase                                                      | Tn1212, Tn1258, Tn1319 |
| B9H01_RS04680    | Lantibiotic-modifying protein                                    | Tn1470, Tn1664, Tn1809 |
| B9H01_RS04705    | MULTISPECIES: hypothetical protein                               | Tn118, Tn873, Tn1353   |
| B9H01_RS04755    | Hypothetical protein                                             | Tn492, Tn745, Tn1499   |
| B9H01_RS04810    | Hypothetical protein                                             | Tn561, Tn572, Tn675    |
| B9H01_RS04840    | Hypothetical protein                                             | Tn62, Tn524, Tn1665    |
| B9H01_RS04865    | DNA-protecting protein (DprA)                                    | Tn30, Tn1367, Tn1838   |
| B9H01_RS05010    | N-acetyltransferase                                              | Tn530, Tn1046, Tn1159  |
| B9H01_RS05045    | N-acetyltransferase                                              | Tn8, Tn389, Tn546      |
| B9H01_RS05080    | PTS lactose transporter subunit IIBC                             | Tn853, Tn1132, Tn1885  |
| B9H01_RS05110    | Galactose-6-phosphate isomerase subunit (LacA)                   | Tn101, Tn1347, Tn1397  |
| B9H01_RS05525    | Membrane protein                                                 | Tn937, Tn1393, Tn1538  |
| B9H01_RS05600    | Glycosyl hydrolase                                               | Tn711, Tn997, Tn1241   |
| B9H01_RS05620    | Mannosyl dehydratase                                             | Tn370, Tn968, Tn1317   |
| B9H01_RS05645    | Sugar kinase                                                     | Tn489, Tn503, Tn507    |
| B9H01_RS06510    | Atpase                                                           | Tn333, Tn336, Tn1759   |
| B9H01_RS07195    | Transcription anti-terminator (BglG)                             | Tn108, Tn111, Tn1140   |
| B9H01_RS09370    | Glsb/yeaq/ymge family stress response membrane protein           | Tn231, Tn275, Tn1551   |
| B9H01_RS00720    | DUF2971 domain-containing protein                                | Tn308, Tn1549          |
| B9H01_RS00815    | Type II secretion system protein                                 | Tn466, Tn467           |
| B9H01_RS00830    | Hypothetical protein                                             | Tn37, Tn423            |
| B9H01_RS00935    | Aromatic acid exporter family protein                            | Tn1615, Tn1677         |
| B9H01_RS00980    | Sugar ABC transporter substrate-binding protein                  | Tn445, Tn494           |
| B9H01_RS01000    | MULTISPECIES: branched-chain amino acid ABC transporter permease | Tn755, Tn1157          |

| Locus Tag     | Protein Name                                                                 | Tn Mutants            |
|---------------|------------------------------------------------------------------------------|-----------------------|
| B9H01_RS01015 | Hypothetical protein                                                         | Tn1312, Tn838         |
| B9H01_RS01035 | ABC transporter ATP-binding protein                                          | Tn948, Tn1474         |
| B9H01_RS01080 | Glycerophosphoryl diester phosphodiesterase                                  | Tn889, Tn1290         |
| B9H01_RS01370 | Tetr/acrr family transcriptional regulator                                   | Tn1066, Tn1807        |
| B9H01_RS01465 | Bifunctional acetaldehyde-coa/alcohol dehydrogenase                          | Tn1047, Tn1321        |
| B9H01_RS01475 | ABC transporter ATP-binding protein                                          | Tn541, Tn1173         |
| B9H01_RS01575 | MULTISPECIES: lipocate-- protein ligase family protein                       | Tn761, Tn1024         |
| B9H01_RS01600 | Hypothetical protein                                                         | Tn212, Tn590          |
| B9H01_RS01965 | ATP-dependent Clp protease ATP-binding subunit                               | Tn972, Tn1794         |
| B9H01_RS02170 | Helicase                                                                     | Tn391, Tn1337         |
| B9H01_RS02475 | DUF1827 domain-containing protein                                            | Tn531, Tn1774         |
| B9H01_RS02480 | NUDIX hydrolase                                                              | Tn1029, Tn1117        |
| B9H01_RS03000 | Hypothetical protein                                                         | Tn88, Tn966           |
| B9H01_RS03250 | Ferrichrome ABC transporter substrate-binding protein                        | Tn65, Tn1326          |
| B9H01_RS03320 | Phosphoserine aminotransferase                                               | Tn1329, Tn1522        |
| B9H01_RS03365 | DUF975 domain-containing protein                                             | Tn868, Tn874          |
| B9H01_RS03375 | DUF975 domain-containing protein                                             | Tn496, Tn1662         |
| B9H01_RS03530 | PTS sugar transporter subunit IIC                                            | Tn255, Tn464          |
| B9H01_RS03535 | Formate C-acetyltransferase/glycerol dehydratase family glycy radical enzyme | Tn793, Tn1559         |
| B9H01_RS03600 | Oligoendopeptidase F                                                         | Tn49, Tn1250          |
| B9H01_RS03650 | ECF transporter S component                                                  | Tn342, Tn1343         |
| B9H01_RS04135 | Calcium-binding protein                                                      | Tn297, Tn1835, Tn1847 |
| B9H01_RS04200 | Hypothetical protein                                                         | Tn35, Tn731, Tn1335   |

| Locus Tag     | Protein Name                                                                         | Tn Mutants     |
|---------------|--------------------------------------------------------------------------------------|----------------|
| B9H01_RS04245 | Hypothetical protein                                                                 | Tn515, Tn1282  |
| B9H01_RS04260 | Hypothetical protein                                                                 | Tn743, Tn744   |
| B9H01_RS04275 | Hypothetical protein                                                                 | Tn179, Tn287   |
| B9H01_RS04280 | Glutamine-hydrolyzing<br>GMP synthase                                                | Tn664, Tn667   |
| B9H01_RS04290 | Putative DNA-binding<br>protein                                                      | Tn1599, Tn1600 |
| B9H01_RS04325 | Tyrosine recombinase<br>(XerS)                                                       | Tn1646, Tn1707 |
| B9H01_RS04340 | DNA-binding response<br>regulator                                                    | Tn565, Tn1655  |
| B9H01_RS04370 | ABC transporter<br>permease                                                          | Tn1204, Tn1734 |
| B9H01_RS04380 | Lipoprotein                                                                          | Tn692, Tn1769  |
| B9H01_RS04400 | Esterase                                                                             | Tn53, Tn470    |
| B9H01_RS04420 | HAD family hydrolase                                                                 | Tn11, Tn930    |
| B9H01_RS04525 | MULTISPECIES: XRE<br>family transcriptional<br>regulator                             | Tn1355, Tn1407 |
| B9H01_RS04535 | MULTISPECIES:<br>tetracycline resistance<br>ribosomal protection<br>protein (Tet(M)) | Tn79, Tn1570   |
| B9H01_RS04545 | MULTISPECIES: conjugal<br>transfer protein                                           | Tn247, Tn971   |
| B9H01_RS04580 | MULTISPECIES: XRE<br>family transcriptional<br>regulator                             | Tn697, Tn1154  |
| B9H01_RS04590 | MULTISPECIES: DNA<br>translocase (FtsK)                                              | Tn71, Tn1026   |
| B9H01_RS04605 | ATP-dependent helicase                                                               | Tn588, Tn1824  |
| B9H01_RS04645 | Hypothetical protein                                                                 | Tn869, Tn1293  |
| B9H01_RS04655 | ATP-binding protein                                                                  | Tn443, Tn1648  |
| B9H01_RS04715 | MULTISPECIES:<br>aminoglycoside<br>nucleotidyltransferase<br>ANT(6)-Ia               | Tn236, Tn410   |
| B9H01_RS04730 | DUF4135 domain-<br>containing protein                                                | Tn540, Tn1642  |
| B9H01_RS04830 | MULTISPECIES:<br>hypothetical protein                                                | Tn1193, Tn1879 |
| B9H01_RS04880 | Rhodanese-like domain-<br>containing protein                                         | Tn630, Tn1917  |
| B9H01_RS04895 | Hemolysin III                                                                        | Tn950, Tn951   |



| <b>Locus Tag</b> | <b>Protein Name</b>                                         | <b>Tn Mutants</b> |
|------------------|-------------------------------------------------------------|-------------------|
| B9H01_RS04900    | Ydcf family protein                                         | Tn1087, Tn1792    |
| B9H01_RS05135    | Integrase                                                   | Tn316, Tn1406     |
| B9H01_RS05150    | Hypothetical protein                                        | Tn936, Tn1591     |
| B9H01_RS05335    | DNA-binding response regulator                              | Tn481, Tn716      |
| B9H01_RS05480    | Hypothetical protein                                        | Tn852, Tn1886     |
| B9H01_RS05495    | Hypothetical protein                                        | Tn1472, Tn1694    |
| B9H01_RS05500    | DUF1700 domain-containing protein                           | Tn165, Tn510      |
| B9H01_RS05530    | Cation transporter                                          | Tn106, Tn1405     |
| B9H01_RS05565    | DUF4956 domain-containing protein                           | Tn1004, Tn1718    |
| B9H01_RS05605    | Beta-hexosamidase                                           | Tn454, Tn560      |
| B9H01_RS05610    | HAD family hydrolase                                        | Tn495, Tn604      |
| B9H01_RS05615    | MULTISPECIES: dioxygenase                                   | Tn153, Tn544      |
| B9H01_RS05625    | Glucuronate isomerase                                       | Tn186, Tn1753     |
| B9H01_RS05740    | DNA alkylation repair protein                               | Tn244, Tn1689     |
| B9H01_RS05815    | Citrate synthase                                            | Tn815, Tn834      |
| B9H01_RS05895    | Glucuronyl hydrolase                                        | Tn375, Tn694      |
| B9H01_RS06065    | ABC transporter permease                                    | Tn1380, Tn1653    |
| B9H01_RS06070    | MULTISPECIES: lipoprotein                                   | Tn160, Tn1437     |
| B9H01_RS06460    | ABC transporter substrate-binding protein                   | Tn893, Tn1833     |
| B9H01_RS06805    | Ferrous iron transport protein B                            | Tn1240, Tn1786    |
| B9H01_RS07165    | Prolyl-trna synthetase associated domain-containing protein | Tn325, Tn558      |
| B9H01_RS07380    | Hypothetical protein                                        | Tn58, Tn811       |
| B9H01_RS07495    | Alpha-glucosidase                                           | Tn708, Tn720      |
| B9H01_RS07595    | Hypothetical protein                                        | Tn356, Tn368      |
| B9H01_RS07690    | ABC transporter permease                                    | Tn571, Tn1529     |
| B9H01_RS07960    | DUF2140 domain-containing protein                           | Tn224, Tn1883     |
| B9H01_RS08070    | Prepilin peptidase                                          | Tn1079, Tn1728    |
| B9H01_RS08250    | Aminopeptidase C                                            | Tn796, Tn808      |
| B9H01_RS08490    | MATE family efflux transporter                              | Tn461, Tn1090     |

| Locus Tag     | Protein Name                                                                                                | Tn Mutants     |
|---------------|-------------------------------------------------------------------------------------------------------------|----------------|
| B9H01_RS08600 | Restriction endonuclease subunit S                                                                          | Tn878, Tn1247  |
| B9H01_RS08855 | Membrane protein                                                                                            | Tn514, Tn932   |
| B9H01_RS09320 | Rna pseudouridine synthase                                                                                  | Tn113, Tn586   |
| B9H01_RS09530 | Serine protease                                                                                             | Tn1630, Tn1737 |
| B9H01_RS09560 | Rlua family pseudouridine synthase                                                                          | Tn1058, Tn1919 |
| B9H01_RS10245 | Hypothetical protein                                                                                        | Tn407, Tn424   |
| B9H01_RS10350 | Thiol reductase thioredoxin                                                                                 | Tn499, Tn522   |
| B9H01_RS00230 | MULTISPECIES: phosphoribosyl aminoimidazolesuccinocarboxamide synthase                                      | Tn1185         |
| B9H01_RS00255 | Bifunctional phosphoribosylaminoimidazolecarboxamide formyltransferase/inosine monophosphate cyclohydrolase | Tn955          |
| B9H01_RS00275 | Hypothetical protein                                                                                        | Tn12           |
| B9H01_RS00315 | Membrane protein                                                                                            | Tn1152         |
| B9H01_RS00690 | Replication initiation factor domain-containing protein                                                     | Tn1374         |
| B9H01_RS00710 | Hypothetical protein                                                                                        | Tn97           |
| B9H01_RS00770 | Tyrosine--trna ligase                                                                                       | Tn832          |
| B9H01_RS00800 | Competence protein (CglA)                                                                                   | Tn1523         |
| B9H01_RS00820 | Type II secretion pathway, pseudopilin (PulG)                                                               | Tn1761         |
| B9H01_RS00860 | DUF4651 domain-containing protein                                                                           | Tn1597         |
| B9H01_RS00940 | Merr family transcriptional regulator                                                                       | Tn323          |
| B9H01_RS00985 | Sugar ABC transporter permease                                                                              | Tn1            |
| B9H01_RS01045 | Glycoside hydrolase family 1 protein                                                                        | Tn392          |
| B9H01_RS01070 | Transketolase                                                                                               | Tn883          |
| B9H01_RS01110 | Chemotaxis protein                                                                                          | Tn84           |
| B9H01_RS01125 | Formate C-acetyltransferase                                                                                 | Tn1862         |

| Locus Tag     | Protein Name                                                              | Tn Mutants |
|---------------|---------------------------------------------------------------------------|------------|
| B9H01_RS01185 | ABC transporter permease                                                  | Tn414      |
| B9H01_RS01200 | Glucosamine-6-phosphate isomerase                                         | Tn1228     |
| B9H01_RS01205 | Copper-exporting atpase                                                   | Tn1344     |
| B9H01_RS01295 | Transcriptional regulator                                                 | Tn485      |
| B9H01_RS01305 | Hypothetical protein                                                      | Tn472      |
| B9H01_RS01320 | Mechanosensitive ion channel family protein                               | Tn892      |
| B9H01_RS01335 | NADP-specific glutamate dehydrogenase                                     | Tn1421     |
| B9H01_RS01360 | Membrane protein                                                          | Tn1006     |
| B9H01_RS01440 | Methyl-accepting chemotaxis protein                                       | Tn1848     |
| B9H01_RS01500 | MATE family efflux transporter                                            | Tn652      |
| B9H01_RS01550 | Heat-inducible transcriptional repressor (HrcA)                           | Tn548      |
| B9H01_RS01665 | NADH: flavin oxidoreductase                                               | Tn748      |
| B9H01_RS01695 | Glycosyl transferase                                                      | Tn1654     |
| B9H01_RS01790 | Pyridoxal phosphate-dependent aminotransferase                            | Tn1512     |
| B9H01_RS01925 | Hypothetical protein                                                      | Tn830      |
| B9H01_RS01960 | Peptide deformylase                                                       | Tn1100     |
| B9H01_RS01985 | Endonuclease                                                              | Tn1182     |
| B9H01_RS01990 | PTS glucose transporter subunit IIBC                                      | Tn715      |
| B9H01_RS01995 | DUF2812 domain-containing protein                                         | Tn1014     |
| B9H01_RS02050 | Ribosomal RNA small subunit methyltransferase G                           | Tn181      |
| B9H01_RS02250 | 23S rna (uracil(1939)-C(5))-methyltransferase rlmd                        | Tn1137     |
| B9H01_RS02275 | Gntr family transcriptional regulator                                     | Tn1332     |
| B9H01_RS02285 | PTS system mannose/fructose/N-acetylgalactosamine-transporter subunit IIB | Tn1680     |

| Locus Tag     | Protein Name                                                  | Tn Mutants |
|---------------|---------------------------------------------------------------|------------|
| B9H01_RS02345 | DEAD/DEAH box<br>helicase                                     | Tn858      |
| B9H01_RS02360 | Hypothetical protein                                          | Tn862      |
| B9H01_RS02395 | Ribonuclease G                                                | Tn1888     |
| B9H01_RS02485 | ATP-dependent Clp<br>protease ATP-binding<br>subunit          | Tn394      |
| B9H01_RS02495 | Amino acid ABC<br>transporter permease                        | Tn735      |
| B9H01_RS02520 | Signal peptidase I                                            | Tn128      |
| B9H01_RS02525 | Hypothetical protein                                          | Tn147      |
| B9H01_RS02545 | Merr family<br>transcriptional regulator                      | Tn1034     |
| B9H01_RS02580 | Bioy family transporter                                       | Tn636      |
| B9H01_RS02585 | Cyclase                                                       | Tn1467     |
| B9H01_RS02610 | N5,N10-methylene<br>tetrahydromethanopterin<br>reductase      | Tn1113     |
| B9H01_RS02615 | Hypothetical protein                                          | Tn1055     |
| B9H01_RS02720 | Hypothetical protein                                          | Tn1907     |
| B9H01_RS02750 | Igm protease                                                  | Tn1443     |
| B9H01_RS02830 | PLP-dependent<br>aminotransferase family<br>protein           | Tn110      |
| B9H01_RS03095 | MATE family efflux<br>transporter                             | Tn1693     |
| B9H01_RS03140 | Carbamate kinase                                              | Tn220      |
| B9H01_RS03240 | Iron ABC transporter<br>permease                              | Tn1210     |
| B9H01_RS03295 | Yitt family protein                                           | Tn1091     |
| B9H01_RS03355 | Hypothetical protein                                          | Tn1717     |
| B9H01_RS03360 | Amino acid permease                                           | Tn674      |
| B9H01_RS03370 | DUF975 domain-<br>containing protein                          | Tn438      |
| B9H01_RS03505 | MULTISPECIES: glycyl-<br>radical enzyme activating<br>protein | Tn1543     |
| B9H01_RS03575 | Glycerol kinase                                               | Tn725      |
| B9H01_RS03585 | Aquaporin family protein                                      | Tn259      |
| B9H01_RS03620 | HAD family hydrolase                                          | Tn847      |
| B9H01_RS03635 | Thiamine phosphate<br>synthase                                | Tn1602     |

| Locus Tag     | Protein Name                                              | Tn Mutants |
|---------------|-----------------------------------------------------------|------------|
| B9H01_RS03640 | MULTISPECIES: Crp/Fnr family transcriptional regulator    | Tn782      |
| B9H01_RS03815 | Hypothetical protein                                      | Tn416      |
| B9H01_RS03900 | SAM-dependent methyltransferase                           | Tn1466     |
| B9H01_RS03935 | Deacetylase                                               | Tn1143     |
| B9H01_RS04005 | Guanosine monophosphate reductase                         | Tn286      |
| B9H01_RS04025 | Histidinol-phosphate aminotransferase                     | Tn1613     |
| B9H01_RS04080 | Hypothetical protein                                      | Tn57       |
| B9H01_RS04085 | Hypothetical protein                                      | Tn184      |
| B9H01_RS04210 | Atpase AAA                                                | Tn473      |
| B9H01_RS04255 | Membrane protein                                          | Tn1606     |
| B9H01_RS04285 | Gntr family transcriptional regulator                     | Tn900      |
| B9H01_RS04295 | Signal recognition particle protein                       | Tn1710     |
| B9H01_RS04310 | Adenylyl-sulfate kinase                                   | Tn1447     |
| B9H01_RS04315 | Abortive phage infection protein                          | Tn1261     |
| B9H01_RS04455 | Membrane protein                                          | Tn474      |
| B9H01_RS04460 | ABC transporter ATP-binding protein                       | Tn1149     |
| B9H01_RS04470 | Pqqd family protein                                       | Tn1063     |
| B9H01_RS04500 | MULTISPECIES: transposase                                 | Tn641      |
| B9H01_RS04505 | MULTISPECIES: excisionase                                 | Tn1778     |
| B9H01_RS04520 | MULTISPECIES: sigma-70 family RNA polymerase sigma factor | Tn840      |
| B9H01_RS04530 | MULTISPECIES: conjugal transfer protein                   | Tn1231     |
| B9H01_RS04550 | MULTISPECIES: peptidase P60                               | Tn378      |
| B9H01_RS04585 | MULTISPECIES: hypothetical protein                        | Tn1244     |
| B9H01_RS04595 | MULTISPECIES: DUF961 domain-containing protein            | Tn1166     |

| Locus Tag     | Protein Name                                           | Tn Mutants |
|---------------|--------------------------------------------------------|------------|
| B9H01_RS04665 | ABC transporter permease                               | Tn1224     |
| B9H01_RS04685 | MULTISPECIES: hypothetical protein                     | Tn1651     |
| B9H01_RS04690 | MULTISPECIES: recombinase                              | Tn139      |
| B9H01_RS04720 | MULTISPECIES: adenine phosphoribosyltransferase        | Tn1908     |
| B9H01_RS04735 | Type A2 lantipeptide                                   | Tn1827     |
| B9H01_RS04770 | Transcriptional regulator                              | Tn616      |
| B9H01_RS04800 | MULTISPECIES: hypothetical protein                     | Tn360      |
| B9H01_RS04820 | MULTISPECIES: hypothetical protein                     | Tn1037     |
| B9H01_RS04835 | DNA (cytosine-5-)-methyltransferase                    | Tn1758     |
| B9H01_RS04890 | DUF1836 domain-containing protein                      | Tn28       |
| B9H01_RS04905 | Ribonuclease HII                                       | Tn1547     |
| B9H01_RS04925 | 5\'-nucleotidase                                       | Tn1555     |
| B9H01_RS04940 | Glycosyltransferase                                    | Tn642      |
| B9H01_RS04970 | Lysr family transcriptional regulator                  | Tn1625     |
| B9H01_RS04980 | Glucose-1-phosphate adenylyltransferase subunit (GlgD) | Tn447      |
| B9H01_RS04985 | Glycogen synthase (GlgA)                               | Tn519      |
| B9H01_RS05025 | DUF2971 domain-containing protein                      | Tn1455     |
| B9H01_RS05030 | Excinuclease ABC subunit B                             | Tn925      |
| B9H01_RS05115 | Hypothetical protein                                   | Tn418      |
| B9H01_RS05165 | Paai family thioesterase                               | Tn243      |
| B9H01_RS05200 | Adenylate cyclase                                      | Tn1539     |
| B9H01_RS05240 | Class A sortase                                        | Tn1825     |
| B9H01_RS05340 | Hypothetical protein                                   | Tn388      |
| B9H01_RS05380 | SAM-dependent methyltransferase                        | Tn513      |
| B9H01_RS05385 | Myo-inositol-1(or 4)-monophosphatase                   | Tn1736     |
| B9H01_RS05390 | MULTISPECIES: hypothetical protein                     | Tn1360     |

| <b>Locus Tag</b> | <b>Protein Name</b>                                                                  | <b>Tn Mutants</b> |
|------------------|--------------------------------------------------------------------------------------|-------------------|
| B9H01_RS05490    | Padr family<br>transcriptional regulator                                             | Tn608             |
| B9H01_RS05580    | DUF2087 domain-<br>containing protein                                                | Tn1039            |
| B9H01_RS05630    | 2-dehydro-3-deoxy-<br>phosphogluconate<br>aldolase                                   | Tn596             |
| B9H01_RS05635    | Fadr family<br>transcriptional regulator                                             | Tn891             |
| B9H01_RS05655    | DNA/RNA non-specific<br>endonuclease                                                 | Tn48              |
| B9H01_RS05665    | UDP-N-<br>acetylglucosamine 1-<br>carboxyvinyltransferase                            | Tn140             |
| B9H01_RS05795    | DUF1846 family protein                                                               | Tn163             |
| B9H01_RS05820    | Aconitate hydratase<br>(AcnA)                                                        | Tn452             |
| B9H01_RS05855    | Hyaluronidase                                                                        | Tn1803            |
| B9H01_RS05865    | Hyaluronidase                                                                        | Tn707             |
| B9H01_RS05890    | PTS system<br>mannose/fructose/N-<br>acetylgalactosamine-<br>transporter subunit IIB | Tn1588            |
| B9H01_RS05895    | Glucuronyl hydrolase                                                                 | Tn694             |
| B9H01_RS05910    | Sugar kinase                                                                         | Tn190             |
| B9H01_RS05915    | MULTISPECIES:<br>hypothetical protein                                                | Tn1896            |
| B9H01_RS05940    | Hypothetical protein                                                                 | Tn1010            |
| B9H01_RS06000    | O-methyltransferase                                                                  | Tn1789            |
| B9H01_RS06035    | 3-deoxy-7-<br>phosphoheptulonate<br>synthase                                         | Tn1834            |
| B9H01_RS06050    | 3-dehydroquinate<br>synthase                                                         | Tn1791            |
| B9H01_RS06055    | Hypothetical protein                                                                 | Tn1738            |
| B9H01_RS06060    | ABC transporter ATP-<br>binding protein                                              | Tn619             |
| B9H01_RS06100    | Prephenate<br>dehydrogenase                                                          | Tn1419            |
| B9H01_RS06285    | ZIP family metal<br>transporter                                                      | Tn1528            |
| B9H01_RS06420    | Glutathione-dependent<br>disulfide-bond<br>oxidoreductase                            | Tn617             |

| Locus Tag     | Protein Name                                                         | Tn Mutants |
|---------------|----------------------------------------------------------------------|------------|
| B9H01_RS06470 | Sugar ABC transporter permease                                       | Tn237      |
| B9H01_RS06485 | Glyoxalase/bleomycin resistance/extradiol dioxygenase family protein | Tn175      |
| B9H01_RS06490 | DUF2500 domain-containing protein                                    | Tn1496     |
| B9H01_RS06660 | ABC transporter permease                                             | Tn437      |
| B9H01_RS06680 | Copper-translocating P-type atpase                                   | Tn14       |
| B9H01_RS06685 | Peptidase C69                                                        | Tn587      |
| B9H01_RS06760 | PTS glucose transporter subunit IIBC                                 | Tn1235     |
| B9H01_RS06770 | Thiol-activated toxin suilysin                                       | Tn1806     |
| B9H01_RS06775 | Haloacid dehalogenase                                                | Tn1400     |
| B9H01_RS06880 | TVP38/TMEM64 family protein                                          | Tn1187     |
| B9H01_RS06955 | MULTISPECIES: vanz family protein                                    | Tn1461     |
| B9H01_RS07005 | Type I restriction endonuclease subunit R                            | Tn390      |
| B9H01_RS07055 | Serine/threonine transporter (SstT)                                  | Tn912      |
| B9H01_RS07080 | ABC transporter ATP-binding protein                                  | Tn1751     |
| B9H01_RS07175 | ABC transporter permease                                             | Tn1408     |
| B9H01_RS07300 | Site-specific integrase                                              | Tn1916     |
| B9H01_RS07335 | Hypothetical protein                                                 | Tn1782     |
| B9H01_RS07385 | Site-specific integrase                                              | Tn1712     |
| B9H01_RS07415 | Chorismate mutase                                                    | Tn377      |
| B9H01_RS07420 | Voltage-gated chloride channel protein                               | Tn722      |
| B9H01_RS07445 | Hypothetical protein                                                 | Tn806      |
| B9H01_RS07450 | Hypothetical protein                                                 | Tn800      |
| B9H01_RS07470 | Branched-chain amino acid ABC transporter permease                   | Tn433      |
| B9H01_RS07500 | Sucrose phosphorylase                                                | Tn1611     |



| Locus Tag     | Protein Name                                          | Tn Mutants |
|---------------|-------------------------------------------------------|------------|
| B9H01_RS07530 | Pyridoxal phosphate-dependent aminotransferase        | Tn676      |
| B9H01_RS07535 | Cystathionine gamma-synthase                          | Tn310      |
| B9H01_RS07540 | Hypothetical protein                                  | Tn1478     |
| B9H01_RS07550 | Hypothetical protein                                  | Tn884      |
| B9H01_RS07610 | Histidine triad protein                               | Tn121      |
| B9H01_RS07670 | Hypothetical protein                                  | Tn777      |
| B9H01_RS07710 | DUF2974 domain-containing protein                     | Tn836      |
| B9H01_RS07740 | Hypothetical protein                                  | Tn1082     |
| B9H01_RS07810 | Yihy/virulence factor brkb family protein             | Tn1853     |
| B9H01_RS07850 | Peptidase M42                                         | Tn51       |
| B9H01_RS08090 | 23S rna (adenine(2503)-C(2))-methyltransferase (RlmN) | Tn182      |
| B9H01_RS08185 | Trna(cytidine(34)-2'-O) methyltransferase             | Tn441      |
| B9H01_RS08190 | Hypothetical protein                                  | Tn1865     |
| B9H01_RS08275 | Membrane protein insertase (YidC)                     | Tn1900     |
| B9H01_RS08520 | Hypothetical protein                                  | Tn1336     |
| B9H01_RS08555 | Methylenetetrahydrofolate reductase                   | Tn1535     |
| B9H01_RS08565 | Cof-type HAD-IIB family hydrolase                     | Tn365      |
| B9H01_RS08605 | DEAD/DEAH box helicase                                | Tn1180     |
| B9H01_RS08615 | Site-specific integrase                               | Tn512      |
| B9H01_RS08635 | N-acetyltransferase                                   | Tn215      |
| B9H01_RS08750 | PTS beta-glucoside transporter subunit IIBC A         | Tn346      |
| B9H01_RS08760 | Laci family transcriptional regulator                 | Tn1636     |
| B9H01_RS08785 | Excinuclease ABC subunit (UvrA)                       | Tn1510     |
| B9H01_RS08860 | Lipoprotein                                           | Tn1264     |
| B9H01_RS08930 | Methyl-accepting chemotaxis protein                   | Tn1345     |
| B9H01_RS09075 | Sugar translocase                                     | Tn1633     |
| B9H01_RS09155 | ABC transporter ATP-binding protein                   | Tn1813     |

| Locus Tag     | Protein Name                                                      | Tn Mutants |
|---------------|-------------------------------------------------------------------|------------|
| B9H01_RS09185 | Hypothetical protein                                              | Tn1537     |
| B9H01_RS09190 | Sugar ABC transporter<br>substrate-binding protein                | Tn1629     |
| B9H01_RS09225 | Alpha-1,2-mannosidase                                             | Tn1836     |
| B9H01_RS09230 | Endo-beta-N-<br>acetylglucosaminidase                             | Tn1069     |
| B9H01_RS09270 | GNAT family<br>acetyltransferase                                  | Tn143      |
| B9H01_RS09350 | 3-isopropylmalate<br>dehydratase small<br>subunit                 | Tn267      |
| B9H01_RS09355 | 3-isopropylmalate<br>dehydratase large subunit                    | Tn152      |
| B9H01_RS09405 | Dihydroxyacetone kinase<br>subunit (DhaK)                         | Tn767      |
| B9H01_RS09460 | Nuclease                                                          | Tn1621     |
| B9H01_RS09520 | Adenylate kinase                                                  | Tn209      |
| B9H01_RS09680 | Tatd family<br>deoxyribonuclease                                  | Tn631      |
| B9H01_RS09705 | Argininosuccinate lyase                                           | Tn277      |
| B9H01_RS09740 | Amino acid permease                                               | Tn117      |
| B9H01_RS09845 | Serine/threonine protein<br>phosphatase                           | Tn1556     |
| B9H01_RS09920 | Pullulanase                                                       | Tn76       |
| B9H01_RS09985 | 6-phospho-beta-<br>glucosidase                                    | Tn1875     |
| B9H01_RS10115 | Carboxypeptidase<br>regulatory-like domain-<br>containing protein | Tn1102     |
| B9H01_RS10125 | Membrane protein                                                  | Tn585      |
| B9H01_RS10185 | Metallophosphatase                                                | Tn865      |
| B9H01_RS10245 | Hypothetical protein                                              | Tn424      |
| B9H01_RS10260 | Sugar ABC transporter<br>permease                                 | Tn1851     |
| B9H01_RS10280 | Type I pullulanase                                                | Tn39       |
| B9H01_RS10315 | Glycosyl hydrolase                                                | Tn376      |
| B9H01_RS10335 | ATP-binding protein                                               | Tn973      |
| B9H01_RS10340 | Phosphoesterase                                                   | Tn1279     |
