# Supplementary material for: Screening for Virulence-Related Genes via a Transposon Mutant Library of Streptococcus suis Serotype 2 Using a Galleria mellonella Larvae Infection Model
Source: MDPI journal article supplement (doi:10.3390/microorganisms10050868), 2022-04-21
Supplement: s1 [file s1]

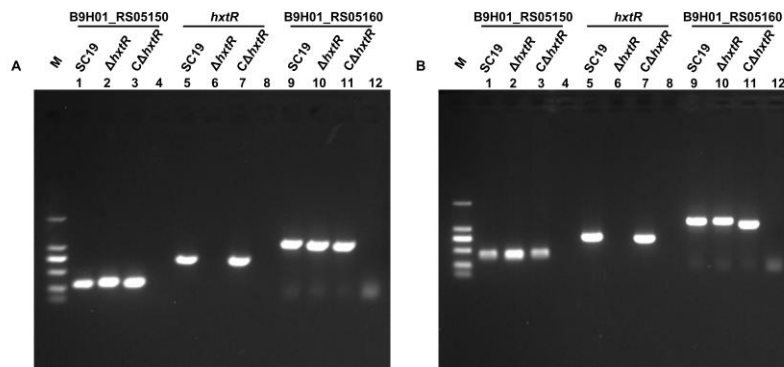

**Figure S1.** Verification of  $\Delta hxtR$  and  $C\Delta hxtR$  by PCR and RT-PCR. (A) Identification of  $\Delta hxtR$  and  $C\Delta hxtR$  by PCR. Lanes 1-4 show the amplification of the upstream gene of *hxtR* using the primer pair 5150-F/R. Lanes 5-8 show the amplification of *hxtR* using the primer pair *hxtR*-F/R. Lanes 9-12 show the amplification of the downstream gene of *hxtR* using the primer pair 5160-F/R. In lanes 1, 5, and 9, the genomic DNA of *S. suis* SC19 was used as the template for PCR. In lanes 2, 6, and 10, the genomic DNA of  $\Delta hxtR$  was used as the template for PCR. In lanes 3, 7, and 11, the genomic DNA of  $C\Delta hxtR$  was used as the template for PCR. Lanes 4, 8, and 12 represent the negative control. (B) Identification of  $\Delta hxtR$  and  $C\Delta hxtR$  by RT-PCR. Same primers were used as above and the cDNA of SC19,  $\Delta hxtR$ , and  $C\Delta hxtR$  were used as templates in the PCR.
